# Supplementary material
Source: PubMed Central journal article supplement (PMC2787783)
Supplement: NIHMS130413-supplement-01.pdf [file NIHMS130413-supplement-01.pdf]

SUPPLEMENTARY MATERIAL

Table S1-S7. Allelic frequencies of the seven microsatellite loci across the hybrid zone. We excluded GT9 since it had a very large number of null alleles. Ho and He refer to observed and expected heterozygosity rates, stars below the comparison refer to the significance of the deviation of observed from expected (\*\*<0.01; \*<0.05).

**S1**

| CQ11 | Aba  | Sapp | Saga | Paju | Suwo | Non  | Beij | Shan | Quin |
|------|------|------|------|------|------|------|------|------|------|
| 256  | 0.04 |      |      |      |      | 0.04 | 0.03 |      |      |
| 257  | 0.07 |      | 0.07 |      | 0.08 | 0.27 | 0.18 | 0.13 |      |
| 258  |      |      |      |      | 0.17 | 0.12 |      |      |      |
| 259  |      | 0.08 |      | 0.25 |      | 0.12 | 0.06 |      |      |
| 261  | 0.18 |      | 0.6  | 0.25 | 0.33 | 0.27 | 0.03 |      |      |
| 263  |      |      |      |      |      | 0.04 | 0.03 |      |      |
| 265  |      |      |      |      |      |      | 0.03 |      |      |
| 268  |      |      |      |      | 0.08 |      | 0.03 |      |      |
| 277  | 0.32 | 0.53 | 0.03 |      |      |      | 0.12 |      |      |
| 278  |      |      |      |      | 0.08 |      | 0.03 |      |      |
| 282  |      | 0.03 | 0.07 | 0.5  | 0.08 | 0.12 | 0.18 | 0.88 | 0.08 |
| 284  |      |      |      |      |      |      | 0.03 |      |      |
| 288  | 0.36 | 0.36 | 0.17 |      | 0.17 | 0.04 | 0.24 |      | 0.83 |
| 289  | 0.04 |      |      |      |      |      | 0.03 |      |      |
| 290  |      |      | 0.07 |      |      |      |      |      | 0.03 |
| 292  |      |      |      |      |      |      |      |      | 0.06 |
| Ho   | 0.5  | 0.33 | 0.13 | 0.5  | 0.5  | 0.46 | 0.35 | 0    | 0.17 |
| He   | 0.76 | 0.6  | 0.62 | 0.71 | 0.88 | 0.84 | 0.88 | 0.23 | 0.3  |

**S2**

| CQ26 | Aba  | Sapp | Saga | Paju | Suwo | Non  | Beij | Shan | Quin |
|------|------|------|------|------|------|------|------|------|------|
| 181  |      |      |      |      |      |      |      | 0.06 |      |
| 187  |      |      |      |      |      |      |      |      |      |
| 190  |      |      |      |      |      | 0.03 |      |      |      |
| 193  |      |      |      |      | 0.14 |      |      |      |      |
| 198  |      |      |      |      | 0.07 |      |      |      |      |
| 199  |      |      |      | 0.25 | 0.07 | 0.22 | 0.05 |      |      |
| 202  |      | 0.02 | 0.03 |      | 0.07 |      | 0.18 | 0.11 |      |
| 204  | 0.08 | 0.17 | 0.13 |      |      | 0.03 | 0.16 | 0.11 |      |
| 205  |      |      |      |      |      |      | 0.02 |      |      |
| 206  |      |      |      |      |      |      |      | 0.17 |      |
| 207  | 0.04 |      | 0.09 | 0.13 | 0.07 | 0.06 | 0.09 |      |      |
| 210  | 0.23 | 0.5  | 0.16 | 0.44 | 0.21 | 0.28 | 0.16 |      | 0.39 |
| 212  | 0.27 | 0.14 | 0.41 | 0.19 | 0.21 | 0.22 | 0.25 | 0.33 | 0.26 |
| 214  | 0.04 | 0.1  | 0.09 |      | 0.14 | 0.16 | 0.09 | 0.22 | 0.34 |
| 216  | 0.35 | 0.07 | 0.09 |      |      |      |      |      |      |
| Ho   | 0.92 | 0.67 | 0.94 | 0.88 | 0.86 | 1    | 0.73 | 0.89 | 0.84 |
| He   | 0.78 | 0.7  | 0.79 | 0.74 | 0.91 | 0.82 | 0.85 | 0.83 | 0.68 |

**S3**

| Emma | Aba  | Sapp | Saga | Paju | Suwo | Non  | Beij | Shan | Quin |
|------|------|------|------|------|------|------|------|------|------|
| 131  |      |      | 0.03 |      |      |      |      |      |      |
| 141  | 0.11 | 0.1  | 0.28 | 0.06 | 0.29 | 0.22 | 0.08 | 0.06 |      |
| 143  | 0.36 | 0.5  | 0.38 | 0.19 | 0.5  | 0.47 | 0.5  | 0.78 | 1    |
| 145  | 0.54 | 0.4  | 0.31 | 0.75 | 0.21 | 0.31 | 0.35 | 0.11 |      |
| 147  |      |      |      |      |      |      | 0.04 |      |      |
| 153  |      |      |      |      |      |      | 0.02 |      |      |
| 155  |      |      |      |      |      |      |      | 0.06 |      |
| Ho   | 0.71 | 0.75 | 0.75 | 0.5  | 0.57 | 0.5  | 0.54 | 0.11 | 0    |
| He   | 0.6  | 0.59 | 0.7  | 0.43 | 0.67 | 0.66 | 0.63 | 0.4  | 0    |

**S4**

| GT12 | Aba  | Sapp | Saga | Paju | Suwo | Non  | Beij | Shan | Quin |
|------|------|------|------|------|------|------|------|------|------|
| 143  |      |      |      |      | 0.07 |      |      |      |      |
| 146  |      |      |      |      |      |      |      | 0.06 |      |
| 148  |      |      |      |      |      | 0.03 |      |      |      |
| 150  |      |      | 0.06 |      |      |      | 0.18 | 0.44 |      |
| 152  | 0.61 | 0.88 | 0.06 | 0.31 | 0.21 | 0.38 | 0.3  | 0.11 |      |
| 155  |      |      |      |      |      |      | 0.02 |      |      |
| 156  | 0.25 | 0.02 | 0.22 | 0.38 | 0.36 | 0.22 | 0.2  | 0.22 | 0.05 |
| 158  | 0.11 | 0.1  | 0.66 | 0.31 | 0.36 | 0.31 | 0.3  | 0.17 | 0.95 |
| 162  |      |      |      |      |      | 0.03 |      |      |      |
| 164  | 0.04 |      |      |      |      | 0.03 |      |      |      |
| Ho   | 0.64 | 0.24 | 0.13 | 0.63 | 0.57 | 0.56 | 0.41 | 0.89 | 0.11 |
| He   | 0.58 | 0.22 | 0.53 | 0.71 | 0.75 | 0.73 | 0.77 | 0.75 | 0.1  |

**S5**

| GT46 | Aba  | Sapp | Saga | Paju | Suwo | Non  | Beij | Shan | Quin |
|------|------|------|------|------|------|------|------|------|------|
| 261  | 0.07 | 0.13 | 0.19 | 0.07 | 0.07 | 0.19 | 0.15 | 0.39 |      |
| 262  | 0.04 | 0.05 | 0.06 | 0.36 | 0.21 | 0.06 | 0.03 |      | 0.18 |
| 263  | 0.04 |      |      |      |      |      |      |      | 0.05 |
| 264  |      |      |      |      |      | 0.03 | 0.05 |      |      |
| 265  |      |      | 0.09 |      | 0.14 |      | 0.08 |      |      |
| 266  | 0.11 | 0.28 | 0.13 | 0.29 |      | 0.34 | 0.13 | 0.06 | 0.26 |
| 267  | 0.21 | 0.05 | 0.19 | 0.21 | 0.36 | 0.19 | 0.25 | 0.39 | 0.32 |
| 268  | 0.04 |      |      |      |      | 0.09 | 0.05 |      | 0.18 |
| 269  | 0.14 | 0.2  | 0.06 |      |      |      |      |      |      |
| 270  | 0.04 | 0.03 | 0.06 |      | 0.07 |      |      |      |      |
| 271  | 0.04 |      | 0.19 |      | 0.07 | 0.03 | 0.05 |      |      |
| 272  | 0.21 | 0.05 |      | 0.07 |      | 0.03 | 0.23 |      |      |
| 273  |      |      |      |      | 0.07 |      |      | 0.06 |      |
| 275  |      |      |      |      |      | 0.03 |      | 0.11 |      |
| 280  | 0.07 | 0.23 |      |      |      |      |      |      |      |
| 286  |      |      | 0.03 |      |      |      |      |      |      |
| Ho   | 0.86 | 1    | 0.88 | 0.57 | 0.71 | 0.88 | 0.75 | 0.67 | 0.68 |
| He   | 0.89 | 0.83 | 0.89 | 0.79 | 0.85 | 0.82 | 0.86 | 0.72 | 0.78 |

\*

\*

**S6**

| GT4 | Aba  | Sapp | Saga | Paju | Suwo | Non  | Beij | Shan | Quin |
|-----|------|------|------|------|------|------|------|------|------|
| 137 |      | 0.05 |      |      |      |      |      |      |      |
| 144 |      |      |      |      |      |      |      |      | 0.23 |
| 147 | 0.14 | 0.13 |      |      |      |      |      |      |      |
| 148 |      |      |      |      |      |      | 0.06 | 0.06 |      |
| 149 | 0.86 | 0.83 | 0.59 | 0.81 | 0.79 | 0.66 | 0.54 | 0.06 |      |
| 151 |      |      |      |      | 0.14 | 0.09 |      | 0.78 | 0.27 |
| 153 |      |      | 0.31 | 0.06 |      | 0.09 | 0.36 | 0.06 | 0.2  |
| 154 |      |      | 0.03 | 0.06 | 0.07 | 0.06 | 0.02 |      | 0.07 |
| 157 |      |      |      | 0.06 |      | 0.09 | 0.02 | 0.06 |      |
| 159 |      |      | 0.06 |      |      |      |      |      |      |
| 162 |      |      |      |      |      |      |      |      | 0.23 |
| Ho  | 0.14 | 0.35 | 0.5  | 0.38 | 0.43 | 0.63 | 0.4  | 0.33 | 0.77 |
| He  | 0.25 | 0.31 | 0.56 | 0.35 | 0.38 | 0.56 | 0.59 | 0.41 | 0.79 |

**S7**

| GT6b | Aba  | Sapp | Saga | Paju | Suwo | Non  | Beij | Shan | Quin |
|------|------|------|------|------|------|------|------|------|------|
| 123  |      |      |      |      |      | 0.09 |      |      |      |
| 130  |      |      |      | 0.13 | 0.21 | 0.13 | 0.02 | 0.28 | 0.36 |
| 132  |      | 0.29 | 0.13 | 0.19 |      | 0.06 | 0.07 | 0.06 |      |
| 134  | 0.15 | 0.19 |      | 0.13 | 0.14 | 0.13 | 0.2  |      | 0.07 |
| 136  | 0.69 | 0.43 | 0.07 |      | 0.36 | 0.13 | 0.22 | 0.61 | 0.16 |
| 137  | 0.08 |      | 0.07 |      |      | 0.28 |      |      |      |
| 138  | 0.08 | 0.1  | 0.3  |      | 0.14 |      | 0.33 |      | 0.34 |
| 140  |      |      | 0.03 | 0.25 | 0.07 | 0.06 |      |      | 0.07 |
| 143  |      |      | 0.27 | 0.31 |      | 0.03 | 0.07 |      |      |
| 145  |      |      | 0.1  |      |      | 0.06 | 0.04 |      |      |
| 147  |      |      | 0.03 |      |      |      | 0.07 |      |      |
| 149  |      |      |      |      | 0.07 |      |      | 0.06 |      |
| 153  |      |      |      |      |      | 0.03 |      |      |      |
| Ho   | 0.38 | 0.52 | 0.6  | 0.75 | 0.57 | 0.88 | 0.48 | 0.44 | 0.86 |
| He   | 0.5  | 0.71 | 0.83 | 0.83 | 0.84 | 0.88 | 0.81 | 0.58 | 0.73 |
|      | *    | **   | **   |      | **   |      | **   | **   |      |

Please refer to Table 1 for more detailed location information. Aba= Abashiri; Sapp=Sapporo; Saga=Saga; Paju=Paju; Suwo=Suwon; Non=Nonsan; Beij=specimens from Beijing, Tianjin, Shijiazhuang, and Taiuman, China; Shan= Shanghai, China; Quin= specimens of *Cx. quinquefasciatus* from Okinawa, Japan and Shanghai, China.
